# Supplementary material for: Typhoid conjugate vaccine effectiveness in Malawi: evaluation of a test-negative design using randomised, controlled clinical trial data
Source: PubMed Central journal article supplement (PMC9748309; doi:10.1016/s2214-109x(22)00466-1), 2022-11-25
Supplement: mmc1.pdf [file mmc1.pdf]

# THE LANCET

## Global Health

### Supplementary appendix

This appendix formed part of the original submission and has been peer reviewed. We post it as supplied by the authors.

Supplement to: Liang Y, Driscoll AJ, Patel PD, et al. Typhoid conjugate vaccine effectiveness in Malawi: evaluation of a test-negative design using randomised, controlled clinical trial data. *Lancet Glob Health* 2022; published online Nov 25. [https://doi.org/10.1016/S2214-109X\(22\)00466-1](https://doi.org/10.1016/S2214-109X(22)00466-1).

## Supplementary Materials

### Section A: Mahalanobis multivariate-distance nearest-neighbor matching

Mahalanobis multivariate-distance nearest-neighbor matching without replacement is an effective tool that we used to generate a 1:3 case-control matched sample. Before matching, there were 101 test-positive specimens (cases) and 8,060 test-negative specimens (controls). For each case, we wanted to select three controls matched on age categories (<2 vs. 2-<5 vs. ≥ 5), study site (Ndirande vs. Zingwangwa), and the date of blood culture (BC). We used the “kmatch” function in Stata/SE for the multivariate-distance matching, which uses Mahalanobis matching by default instead of other methods such as Euclidean, on the above three variables simultaneously, with exact matches on the age and study site dummy variables so that each case and its selected three controls were in the same age category and from the same study site. Without replacement matching was used so that no controls can be matched to multiple cases, resulting in 303 (=101 cases × 3) unique controls. The balancing diagnostics (see the tables and the plot below) indicate that the matching was very successful on both means (StdDif=0) and variances (Ratio=1). In addition, BC dates were matched within 20 days for each case-control pair (97.4% were matched within 7 days).

| Means     | Before Matching |          |          | After Matching |          |         |
|-----------|-----------------|----------|----------|----------------|----------|---------|
|           | Cases           | Controls | StdDif   | Cases          | Controls | StdDif  |
| age_cat1  | .148515         | .247643  | -.250152 | .148515        | .148515  | 0       |
| age_cat2  | .207921         | .346402  | -.312489 | .207921        | .207921  | 0       |
| Zingwangw | .50495          | .420347  | .16986   | .50495         | .50495   | 0       |
| date_BC   | 21874.7         | 21749    | .371624  | 21874.7        | 21874.8  | -.00039 |

| Variances | Before Matching |          |          | After Matching |          |          |
|-----------|-----------------|----------|----------|----------------|----------|----------|
|           | Cases           | Controls | Ratio    | Cases          | Controls | Ratio    |
| age_cat1  | .1277228        | .1863389 | .6854327 | .1277228       | .1268769 | 1.006667 |
| age_cat2  | .1663366        | .2264357 | .7345865 | .1663366       | .1652351 | 1.006667 |
| Zingwangw | .2524752        | .2436857 | 1.036069 | .2524752       | .2508032 | 1.006667 |
| date_BC   | 127312.2        | 101497.9 | 1.254333 | 127312.2       | 126522.4 | 1.006242 |

Age\_cat1=1 if age<2; 0 otherwise

Age\_cat2=1 if age>=2 and age<5; 0 otherwise

Zingwangw=1 if study site = Zingwangw; 0 if study site = Ndirande

date\_BC: date of blood culture. In Stata, a date variable is the number of days from Jan. 1, 1960. For example, date\_BC=0 means Jan. 1, 1960; date\_BC=21874 means Nov. 21, 2019.

StdDif: standardized difference

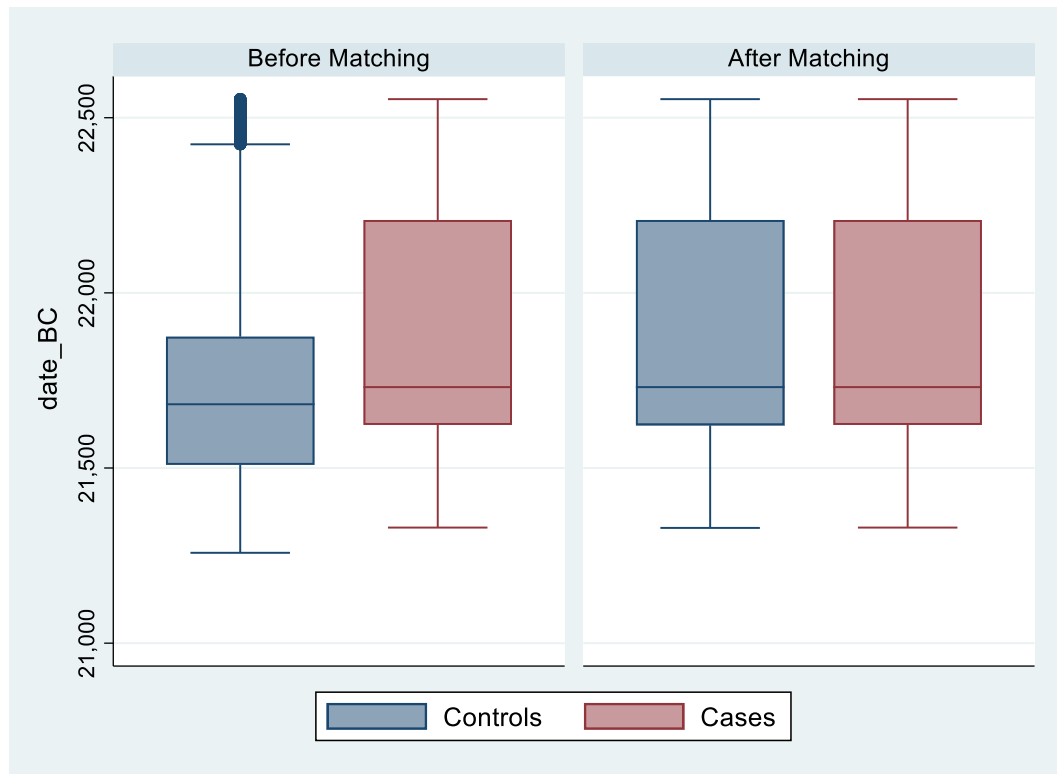

Reference:

Jann B. KMATCH: Stata module module for multivariate-distance and propensity-score matching, including entropy balancing, inverse probability weighting, (coarsened) exact matching, and regression adjustment. Statistical Software Components S458346: Boston College Department of Economics; 2017.

## Section B: Vaccine misclassification analysis in Table 3

**Table 3: Effect of vaccine misclassification on vaccine effectiveness estimation by test-negative design specimen-based analysis<sup>a</sup>**

| Overall vaccine misclassification rate ( $p_1+p_2$ ) | Scenario                                                            | % cases vaccinated by Vi-TT | % controls vaccinated by Vi-TT | VE against typhoid <sup>b</sup> [95% CI] |
|------------------------------------------------------|---------------------------------------------------------------------|-----------------------------|--------------------------------|------------------------------------------|
| 0%                                                   | Gold standard                                                       | 17/101 (16.8%)              | 4092/8060 (50.8%)              | 80.4% [66.9%, 88.4%]                     |
| 5%                                                   | Misclassifying vaccinated as unvaccinated, both groups <sup>c</sup> | 12/101 (11.9%)              | 3689/8060 (45.8%)              | 84.0% [70.8%, 91.3%]                     |
|                                                      | Differential misclassification, lowest possible VE <sup>d</sup>     | 22/101 (21.8%)              | 3689/8060 (45.8%)              | 67.0% [47.0%, 79.5%]                     |
|                                                      | Differential misclassification, highest possible VE <sup>e</sup>    | 12/101 (11.9%)              | 4495/8060 (55.8%)              | 89.3% [80.4%, 94.2%]                     |

$p_1$ =Probability of misclassifying vaccinated as unvaccinated;  $p_2$ =Probability of misclassifying unvaccinated as vaccinated  
 VE = vaccine effectiveness; CI = confidence interval; OR = odds ratio  
 a. See supplementary Section B for additional details  
 b.  $VE=(1-OR)\times 100\%$   
 c. Only misclassifying vaccinated as unvaccinated for both cases and controls due to the loss of vaccination cards, that is,  $p_1+ p_2= p_1$ , hence  $p_2=0$  among both groups  
 d.  $p_1=0$  among cases (misclassifying unvaccinated as vaccinated among cases) and  $p_2=0$  among controls (misclassifying vaccinated as unvaccinated among controls), resulting in the lowest possible VE  
 e.  $p_2=0$  among cases (misclassifying vaccinated as unvaccinated among cases) and  $p_1=0$  among controls (misclassifying unvaccinated as vaccinated among controls), resulting in the highest possible VE

Please review the results above as an example. If there was no vaccine misclassification, as occurs in an RCT, 17 out of 101 (16.8%) cases were vaccinated and 4,092 out of 8,060 (50.8%) controls were vaccinated, resulting in a VE of 80.4%. If the overall vaccine misclassification rate was 5% and both cases and controls were equally likely to be misclassified (since we expect that poor vaccination records affect both cases and controls equally), a total of  $(101+8060)\times 5\%=408$  specimens (5 cases vs. 403 controls) would have a vaccination status that is misclassified. If the probability of misclassifying vaccinated as unvaccinated ( $p_1$ ) is the same as the probability of misclassifying unvaccinated as vaccinated ( $p_2$ ), for example, among the 5 vaccination-status misclassified cases, 2 vaccinated were misclassified as unvaccinated and 3 unvaccinated were misclassified as vaccinated, then  $17-2+3=18$  cases were counted as vaccinated, which was close to the true value of 17. Similarly, among the 403 vaccination-status misclassified controls, if 201 vaccinated were misclassified as unvaccinated and 202 unvaccinated were misclassified as vaccinated, then  $4092-201+202=4093$  controls were counted as vaccinated, which was also close to the true value of 4092. Hence, on average, the expected value of VE will be unchanged if the probability of misclassifying vaccinated as unvaccinated is the same as the probability of misclassifying unvaccinated as vaccinated (i.e.,  $p_1=p_2$ ).

If  $p_2=0$  among both cases and controls, then  $p_1+p_2= p_1=5\%$ . That is, among the 5 vaccination-status misclassified cases and the 403 vaccination-status misclassified controls, misclassification occurred in one direction only: vaccinated were misclassified as unvaccinated due to the loss of vaccination cards. In this scenario,  $17-5=12$  cases were counted as vaccinated and  $4092-403=3689$  controls were counted as vaccinated, resulting in a VE of 84%.

If differential misclassification can occur between cases and controls, the vaccination rate among cases would be highest when 5 unvaccinated cases were misclassified as vaccinated; and the vaccination rate among controls would be lowest when 403 vaccinated controls were misclassified as unvaccinated. In this scenario,  $17+5=22$  cases were counted as vaccinated and  $4092-403=3689$  controls were counted as vaccinated, resulting in the smallest difference in vaccination rate between the cases and the controls, hence the lowest possible VE of 67%. On the other hand, the vaccination rate among cases would be lowest when 5 vaccinated cases were misclassified as unvaccinated; and the vaccination rate among controls would be highest when 403 unvaccinated controls were

misclassified as vaccinated. In this scenario,  $17-5=12$  cases were counted as vaccinated and  $4092+403=4495$  controls were counted as vaccinated, resulting in the largest difference in vaccination rate between the cases and the controls, hence the highest possible VE of 89.3%.

The same logic applies to other vaccine misclassification rates displayed in Table 3.

**Section C: Blood culture (BC) positivity rate and BC sensitivity analyses in Table 4**

**Table 4: Effect of blood culture positivity rate and blood culture test sensitivity on vaccine effectiveness estimation by test-negative design specimen-based analysis<sup>a</sup>**

| Observed % BC typhoid positive | BC sensitivity | Adjusted % BC typhoid positive <sup>b</sup> | Adjusted % cases vaccinated <sup>b</sup> | Adjusted % controls vaccinated <sup>b</sup> | Adjusted VE against typhoid <sup>bc</sup> [95% CI] |
|--------------------------------|----------------|---------------------------------------------|------------------------------------------|---------------------------------------------|----------------------------------------------------|
| 101/8161 (1.2%)                | 100%           | 101/8161 (1.2%)                             | 17/101 (16.8%)                           | 4092/8060 (50.8%)                           | 80.4% [66.9%, 88.4%]                               |
|                                | 80%            | 126/8161 (1.5%)                             | 21/126 (16.7%)                           | 4088/8035 (50.9%)                           | 80.7% [69.1%, 87.9%]                               |

Please review the results above as an example. In our TND specimen-based sample, there were 101 typhoid positive specimens (cases) from a total of 8,161 specimens, resulting in a BC positivity rate of 1.2%. Let  $P$  be the number of real positive cases. If the BC sensitivity is 100%, no adjustment is needed; hence the adjusted BC positivity rate is still  $101/8161=1.2\%$ . If the BC sensitivity is 80%, then  $101/P=0.8$ , hence  $P=101/0.8=126$  and the adjusted BC positivity rate should be  $P/8161=126/8161=1.5\%$ . In this scenario, there should be 126 real positive cases (instead of 101 cases before adjustment) and  $8161-126=8035$  real negative controls (instead of 8060 controls before adjustment). We assume that there was no vaccine misclassification, hence a total of  $17+4092=4109$  specimens were from vaccinated children. In addition, we assume that the vaccination rate among the  $126-101=25$  missed cases (i.e., false negatives) was the same as the vaccination rate among the 101 observed cases (i.e., true positives). Therefore, among the 126 real positive cases,  $126 \times 17/101=21$  were vaccinated; and, among the 8035 real negative controls,  $4109-21=4088$  were vaccinated, resulting in a VE of 80.7%. The same logic applies to other sensitivity values displayed in Table 4.

**Table 4: Effect of blood culture positivity rate and blood culture test sensitivity on vaccine effectiveness estimation by test-negative design specimen-based analysis<sup>a</sup>**

| Observed % BC typhoid positive | BC sensitivity | Adjusted % BC typhoid positive <sup>b</sup> | Adjusted % cases vaccinated <sup>b</sup> | Adjusted % controls vaccinated <sup>b</sup> | Adjusted VE against typhoid <sup>bc</sup> [95% CI] |
|--------------------------------|----------------|---------------------------------------------|------------------------------------------|---------------------------------------------|----------------------------------------------------|
| 101/8161 (1.2%)                | 100%           | 101/8161 (1.2%)                             | 17/101 (16.8%)                           | 4092/8060 (50.8%)                           | 80.4% [66.9%, 88.4%]                               |
| 408/8161 (5.0%)                | 100%           | 408/8161 (5.0%)                             | 69/408 (16.9%)                           | 4040/7753 (52.1%)                           | 81.3% [75.7%, 85.6%]                               |

If we assume the BC positivity rate should be 5% instead of 1.2%, then  $8161 \times 5\%=408$  should be real positive cases and  $8161-408=7753$  should be real negative controls, and the total number of vaccinated is still 4109 due to the no vaccine misclassification assumption. Among the 408 real positive cases,  $408 \times 17/101=69$  are vaccinated; and, among the 7753 real negative controls,  $4109-69=4040$  are vaccinated, resulting in a VE of 81.3%. The same logic applies to other observed BC positivity values displayed in Table 4.

**Table S1: Subgroup analyses by age, sex, and study site**

|                                     | Total  | Test-positive for typhoid, n (column %) | Participant-based analysis                             |                                                          | No BC  | Specimen-based analysis <sup>c</sup>  |                                       |
|-------------------------------------|--------|-----------------------------------------|--------------------------------------------------------|----------------------------------------------------------|--------|---------------------------------------|---------------------------------------|
|                                     |        |                                         | Test-negative no censoring <sup>a</sup> , n (column %) | Test-negative with censoring <sup>b</sup> , n (column %) |        | Test-positive specimens, n (column %) | Test-negative specimens, n (column %) |
| <b>Age &lt; 5</b>                   |        |                                         |                                                        |                                                          |        |                                       |                                       |
| Vi-TT                               | 5,044  | 8 (23.5)                                | 1,704 (49.7)                                           | 1,699 (49.8)                                             | 3,337  | 9 (25.0)                              | 2,412 (50.4)                          |
| MenA                                | 5,158  | 26 (76.5)                               | 1,727 (50.3)                                           | 1,710 (50.2)                                             | 3,422  | 27 (75.0)                             | 2,376 (49.6)                          |
| Total                               | 10,202 | 34                                      | 3,431                                                  | 3,409                                                    | 6,759  | 36                                    | 4,788                                 |
| VE against typhoid <sup>d</sup>     | ..     | 68.6% [30.6%, 85.8%] <sup>e</sup>       | 68.8% [30.9%, 85.9%] <sup>f</sup>                      | 69.0% [31.4%, 86.0%] <sup>g</sup>                        | ..     | ..                                    | 67.2% [30.0%, 84.6%] <sup>h</sup>     |
| [95% CI], p value                   |        | 0.004                                   | 0.002                                                  | 0.002                                                    |        |                                       | 0.002                                 |
| VE against non-typhoid <sup>i</sup> | ..     | ..                                      | -1.1% [-6.8%, 4.2%] <sup>f</sup>                       | -1.6% [-7.3%, 3.8%] <sup>g</sup>                         | ..     | ..                                    | -2.7% [-7.3%, 1.7%] <sup>h</sup>      |
| [95% CI], p value                   |        |                                         | 0.69                                                   | 0.60                                                     |        |                                       | 0.23                                  |
| <b>Age ≥ 5</b>                      |        |                                         |                                                        |                                                          |        |                                       |                                       |
| Vi-TT                               | 8,901  | 8 (12.7)                                | 1,383 (50.6)                                           | 1,378 (50.8)                                             | 7,515  | 8 (12.3)                              | 1,680 (51.3)                          |
| MenA                                | 8,779  | 55 (87.3)                               | 1,352 (49.4)                                           | 1,334 (49.2)                                             | 7,390  | 57 (87.7)                             | 1,592 (48.7)                          |
| Total                               | 17,680 | 63                                      | 2,735                                                  | 2,712                                                    | 14,905 | 65                                    | 3,272                                 |
| VE against typhoid <sup>d</sup>     | ..     | 85.8% [70.1%, 93.2%] <sup>e</sup>       | 85.8% [70.0%, 93.2%] <sup>f</sup>                      | 85.9% [70.3%, 93.3%] <sup>g</sup>                        | ..     | ..                                    | 86.7% [72.0%, 93.7%] <sup>h</sup>     |
| [95% CI], p value                   |        | <0.001                                  | <0.001                                                 | <0.001                                                   |        |                                       | <0.001                                |
| VE against non-typhoid <sup>i</sup> | ..     | ..                                      | -1.0% [-8.2%, 5.7%] <sup>f</sup>                       | -1.9% [-9.2%, 4.9%] <sup>g</sup>                         | ..     | ..                                    | -3.6% [-10.3%, 2.6%] <sup>h</sup>     |
| [95% CI], p value                   |        |                                         | 0.78                                                   | 0.60                                                     |        |                                       | 0.26                                  |
| <b>Male</b>                         |        |                                         |                                                        |                                                          |        |                                       |                                       |
| Vi-TT                               | 6,925  | 8 (16.7)                                | 1,528 (50.6)                                           | 1,524 (50.8)                                             | 5,393  | 9 (17.7)                              | 2,050 (51.4)                          |
| MenA                                | 6,759  | 40 (83.3)                               | 1,492 (49.4)                                           | 1,477 (49.2)                                             | 5,242  | 42 (82.3)                             | 1,940 (48.6)                          |
| Total                               | 13,684 | 48                                      | 3,020                                                  | 3,001                                                    | 10,635 | 51                                    | 3,990                                 |
| VE against typhoid <sup>d</sup>     | ..     | 80.6% [58.5%, 90.9%] <sup>e</sup>       | 80.5% [58.1%, 90.9%] <sup>f</sup>                      | 80.6% [58.5%, 91.0%] <sup>g</sup>                        | ..     | ..                                    | 79.7% [58.2%, 90.2%] <sup>h</sup>     |
| [95% CI], p value                   |        | <0.001                                  | <0.001                                                 | <0.001                                                   |        |                                       | <0.001                                |
| VE against non-typhoid <sup>i</sup> | ..     | ..                                      | -0.1% [-6.6%, 6.0%] <sup>f</sup>                       | -0.7% [-7.3%, 5.5%] <sup>g</sup>                         | ..     | ..                                    | -2.4% [-8.0%, 2.8%] <sup>h</sup>      |
| [95% CI], p value                   |        |                                         | 0.97                                                   | 0.83                                                     |        |                                       | 0.37                                  |
| <b>Female</b>                       |        |                                         |                                                        |                                                          |        |                                       |                                       |
| Vi-TT                               | 7,020  | 8 (16.3)                                | 1,559 (49.6)                                           | 1,553 (49.8)                                             | 5,459  | 8 (16.0)                              | 2,042 (50.2)                          |
| MenA                                | 7,178  | 41 (83.7)                               | 1,587 (50.4)                                           | 1,567 (50.2)                                             | 5,570  | 42 (84.0)                             | 2,028 (49.8)                          |
| Total                               | 14,198 | 49                                      | 3,146                                                  | 3,120                                                    | 11,029 | 50                                    | 4,070                                 |
| VE against typhoid <sup>d</sup>     | ..     | 80.2% [57.8%, 90.7%] <sup>e</sup>       | 80.1% [57.5%, 90.7%] <sup>f</sup>                      | 80.3% [57.9%, 90.8%] <sup>g</sup>                        | ..     | ..                                    | 81.1% [59.6%, 91.1%] <sup>h</sup>     |
| [95% CI], p value                   |        | <0.001                                  | <0.001                                                 | <0.001                                                   |        |                                       | <0.001                                |
| VE against non-typhoid <sup>i</sup> | ..     | ..                                      | -0.6% [-7.0%, 5.4%] <sup>f</sup>                       | -1.3% [-7.8%, 4.8%] <sup>g</sup>                         | ..     | ..                                    | -2.4% [-8.0%, 2.8%] <sup>h</sup>      |
| [95% CI], p value                   |        |                                         | 0.84                                                   | 0.67                                                     |        |                                       | 0.37                                  |

**Table S1: Subgroup analyses by age, sex, and study site (cont.)**

|                                     | Total  | Test-positive for typhoid, n (column %) | Participant-based analysis                             |                                                          | No BC  | Specimen-based analysis <sup>c</sup>  |                                       |
|-------------------------------------|--------|-----------------------------------------|--------------------------------------------------------|----------------------------------------------------------|--------|---------------------------------------|---------------------------------------|
|                                     |        |                                         | Test-negative no censoring <sup>a</sup> , n (column %) | Test-negative with censoring <sup>b</sup> , n (column %) |        | Test-positive specimens, n (column %) | Test-negative specimens, n (column %) |
| <b>Ndirande</b>                     |        |                                         |                                                        |                                                          |        |                                       |                                       |
| Vi-TT                               | 8,772  | 9 (18.8)                                | 1,858 (50.1)                                           | 1,852 (50.2)                                             | 6,911  | 10 (20.0)                             | 2,365 (50.6)                          |
| MenA                                | 8,738  | 39 (81.2)                               | 1,853 (49.9)                                           | 1,839 (49.8)                                             | 6,860  | 40 (80.0)                             | 2,307 (49.4)                          |
| Total                               | 17,510 | 48                                      | 3,711                                                  | 3,691                                                    | 13,771 | 50                                    | 4,672                                 |
| VE against typhoid <sup>d</sup>     | ..     | 77.1% [52.8%, 88.9%] <sup>e</sup>       | 77.0% [52.4%, 88.9%] <sup>f</sup>                      | 77.1% [52.6%, 88.9%] <sup>g</sup>                        | ..     | ..                                    | 75.6% [51.1%, 87.8%] <sup>h</sup>     |
| [95% CI], p value                   |        | <0.001                                  | <0.001                                                 | <0.001                                                   |        |                                       | <0.001                                |
| VE against non-typhoid <sup>i</sup> | ..     | ..                                      | -0% [-5.9%, 5.6%] <sup>f</sup>                         | -0.3% [-6.2%, 5.3%] <sup>g</sup>                         | ..     | ..                                    | -1.6% [-6.8%, 3.3%] <sup>h</sup>      |
| [95% CI], p value                   |        |                                         | 0.99                                                   | 0.91                                                     |        |                                       | 0.52                                  |
| <b>Zingwangwa</b>                   |        |                                         |                                                        |                                                          |        |                                       |                                       |
| Vi-TT                               | 5,173  | 7 (14.3)                                | 1,229 (50.1)                                           | 1,225 (50.4)                                             | 3,941  | 7 (13.7)                              | 1,727 (51.0)                          |
| MenA                                | 5,199  | 42 (85.7)                               | 1,226 (49.9)                                           | 1,205 (49.6)                                             | 3,952  | 44 (86.3)                             | 1,661 (49.0)                          |
| Total                               | 10,372 | 49                                      | 2,455                                                  | 2,430                                                    | 7,893  | 51                                    | 3,388                                 |
| VE against typhoid <sup>d</sup>     | ..     | 83.4% [63.0%, 92.5%] <sup>e</sup>       | 83.4% [62.8%, 92.6%] <sup>f</sup>                      | 83.6% [63.4%, 92.7%] <sup>g</sup>                        | ..     | ..                                    | 84.7% [65.9%, 93.1%] <sup>h</sup>     |
| [95% CI], p value                   |        | <0.001                                  | <0.001                                                 | <0.001                                                   |        |                                       | <0.001                                |
| VE against non-typhoid <sup>i</sup> | ..     | ..                                      | -1.1% [-8.3%, 5.7%] <sup>f</sup>                       | -2.2% [-9.5%, 4.7%] <sup>g</sup>                         | ..     | ..                                    | -3.6% [-9.7%, 2.0%] <sup>h</sup>      |
| [95% CI], p value                   |        |                                         | 0.76                                                   | 0.55                                                     |        |                                       | 0.21                                  |

a. Controls include participants with an episode of non-typhoid illness, without censoring for typhoid (i.e., controls may have tested positive for typhoid at another time point)

b. Controls include participants with an episode of non-typhoid illness, with censoring for typhoid (i.e., controls exclude participants who ever had a test that was typhoid positive during the study period)

c. Cases are typhoid positive specimens and control are typhoid negative specimens

d.  $VE = (1 - OR) \times 100\%$  using the TND sample only

e.  $VE = (1 - IRR) \times 100\%$

f. TND method A

g. TND method B

h. TND method C

i.  $VE = (1 - RR) \times 100\%$  using the whole RCT

BC = blood culture; MenA = meningococcal capsular group A conjugate vaccine; Vi-TT = Vi polysaccharide typhoid conjugate vaccine;

RCT = randomized controlled trial; TND = test-negative design; VE = vaccine efficacy in RCT or vaccine effectiveness in TND;

CI = confidence interval; IRR = incidence rate ratio; RR = risk ratio; OR = odds ratio



**Table S2: Summary of vaccine effectiveness against typhoid estimates using different study designs**

| <b>Study design</b>                                                                                                                                                                         | <b>VE method</b>                                                             | <b>VE against typhoid [95% CI]</b> |
|---------------------------------------------------------------------------------------------------------------------------------------------------------------------------------------------|------------------------------------------------------------------------------|------------------------------------|
| RCT                                                                                                                                                                                         | (1-IRR)×100%                                                                 | 80.4% [66.4%, 88.5%]               |
|                                                                                                                                                                                             | (1-RR)×100%                                                                  | 80.3% [66.3%, 88.4%]               |
| TND specimen-based, all controls used (101 cases vs. 8,060 controls)                                                                                                                        | (1-OR)×100%                                                                  | 80.4% [66.9%, 88.4%]               |
| TND specimen-based <b>1:3 case-control matched</b> , exact matching on age groups (<2, 2-<5, >=5) and study site, BC date matched within 20 days (97.4% matched within 7 days) <sup>a</sup> | (1-OR)×100%<br>unadjusted for matching                                       | 80.9% [66.4%, 89.2%]               |
|                                                                                                                                                                                             | (1-OR)×100%<br>adjusted for matching using mixed-effects logistic regression | 80.9% [66.4%, 89.2%]               |

a. Mahalanobis multivariate-distance nearest-neighbor matching without replacement (101 cases vs. 303 controls)  
VE = vaccine efficacy or vaccine effectiveness; RCT = randomized controlled trial  
IRR = incidence rate ratio; RR = risk ratio; OR = odds ratio; CI = confidence interval
